# Supplementary material for: KLF9 Aggravates Streptozotocin-Induced Diabetic Cardiomyopathy by Inhibiting PPARγ/NRF2 Signalling
Source: MDPI journal article supplement (doi:10.3390/cells11213393), 2022-10-27
Supplement: s1 [file s1]

## Supplementary Materials

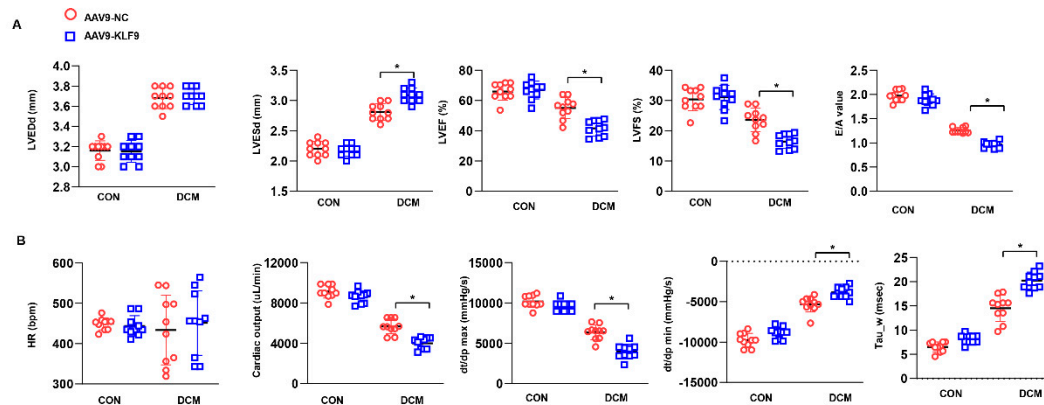

**Figure S1.** KLF9 overexpression deteriorated cardiac dysfunction in DCM. (A) Echocardiographic data in DCM mice (n=10). (B) Pressure-volume loop data in DCM mice (n=10). \*P<0.05.

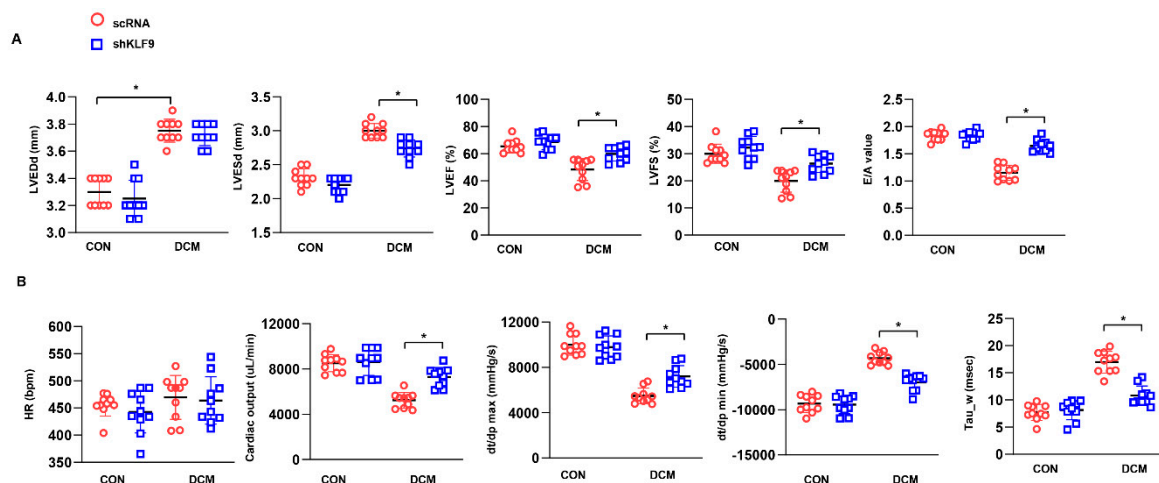

**Figure S2.** KLF9 knockdown ameliorated cardiac dysfunction in DCM (A) Echocardiographic data in DCM mice (n=10). (B) Pressure-volume loop data in DCM mice (n=10). \*P<0.05.

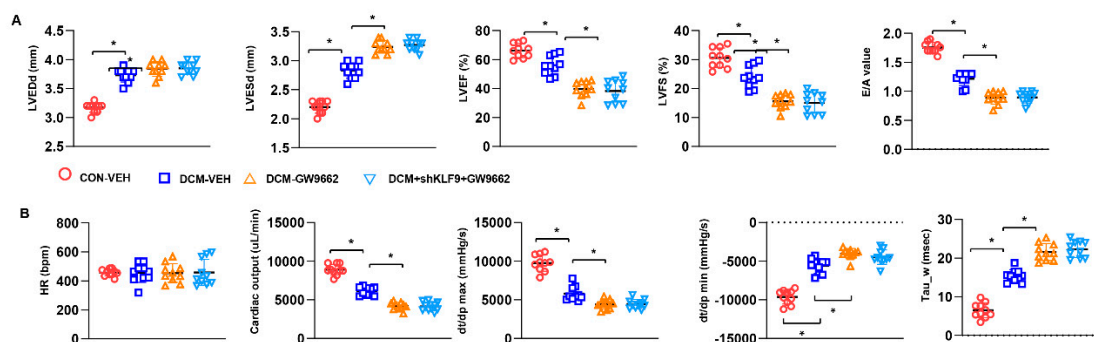

**Figure S3.** Cardiac dysfunction persists in PPAR $\gamma$  inhibition mice with KLF9 knockdown. (A) Echocardiographic data in DCM mice (n=10). (B) Pressure-volume loop data in DCM mice (n=10). \*P<0.05.
